# Supplementary material
Source: HighWire-hosted journal article supplement (https://bibliotheek.ehb.be:2663/highwire/filestream/149337/field_highwire_adjunct_files/0/ejhpharm-2020-002298supp001_data_supplement.pdf)
Supplement: ejhpharm-2020-002298supp001_data_supplement.pdf [file ejhpharm-2020-002298supp001_data_supplement.pdf]

| Error type                                    | Medication process stage    |                |             |                        |         |
|-----------------------------------------------|-----------------------------|----------------|-------------|------------------------|---------|
|                                               | Medication errors total (n) | Administration | Prescribing | Preparation/Dispensing | Storage |
| Wrong Dose/Strength or Frequency              | 1,354 (37.5%)               | 988            | 410         | 112                    | 19      |
| Omitted Medicine or Dose                      | 836 (23.1%)                 | 657            | 213         | 17                     | 40      |
| Wrong Drug                                    | 548 (15.2%)                 | 398            | 169         | 49                     | 5       |
| Wrong Route                                   | 198 (5.5%)                  | 195            | 6           | 5                      | 1       |
| Contraindication                              | 191 (5.3%)                  | 123            | 92          | 3                      | 2       |
| Wrong Patient                                 | 186 (5.2%)                  | 173            | 17          | 2                      | 2       |
| Wrong Formulation or Presentation             | 94 (2.6%)                   | 49             | 16          | 41                     | 0       |
| Adverse Drug Reaction (Allergy related error) | 77 (2.1%)                   | 65             | 20          | 0                      | 0       |
| Wrong Dispensing Label/Instruction            | 66 (1.8%)                   | 39             | 19          | 16                     | 0       |
| Wrong Storage                                 | 60 (1.7%)                   | 33             | 3           | 4                      | 26      |

**Appendix A Medication errors reported to the Norwegian Incident Reporting System (NIRS) in 2016 and 2017. Error type in relation to medication process stage.**

The total number of error types and medication process stages was greater than the number of incidents because the classification system permitted more than one category to be selected for one incident.
